# Supplementary material
Source: Springer Nature journal article supplement (https://www.springermedizin.de/resource/supplementary/13019_2011_494_MOESM3_ESM.pdf/9638430)

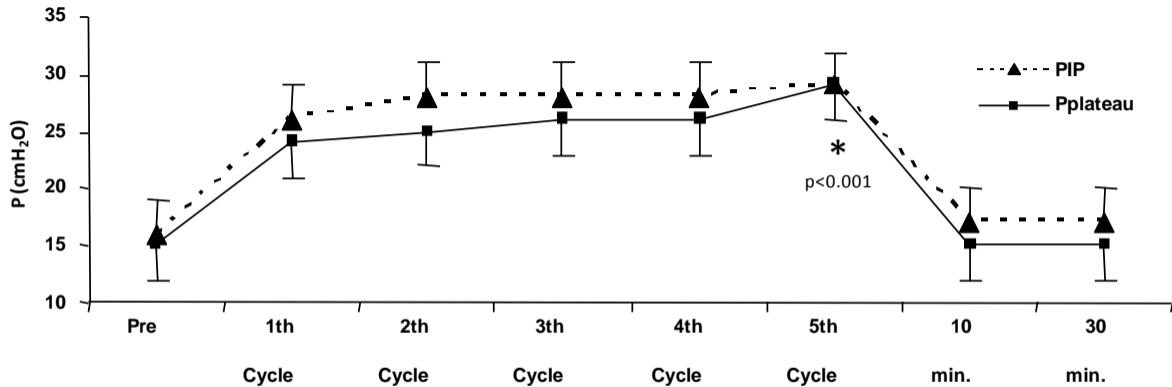

PIP: Peak inspiratory pressure; Pplateau: plateau pressure.

Supplement: MOESM3 [file 9638430]
